# Supplementary material
Source: publisher site journal article supplement (https://www.dovepress.com/get_supplementary_file.php?f=325930.docx)
Supplement: Supplementary file 1 [file get_supplementary_file.php]

| Supplementary Table 1. Odds ratio(OR) and 95% confidence interval (95%CI) of TUGT, WS,GS and their combinations for any-falls group during the follow-up period | | | | | | | |
| --- | --- | --- | --- | --- | --- | --- | --- |
|
| Variables | Any-fallers , | Crude | | Model 1 | | Model 2 | |
| n (%) | OR | 95%CI | OR | 95%CI | OR | 95%CI |
| GS- | 116 (26.7%) | 1.703* | 1.243-2.332 | 1.467* | 1.013-2.124 | 1.498* | 1.032-2.173 |
| WS- | 88  (25.4%) | 1.091 | 0.797-1.495 | 0.887 | 0.634-1.241 | 1.018 | 0.723-1.433 |
| TUGT- | 112 (30.9%) | 2.396* | 1.749-3.283 | 2.187* | 1.563-3.059 | 2.025* | 1.425-2.877 |
| WS-,GS- | 62  (29.0%) | 1.367 | 0.966-1.933 | 1.072 | 0.735-1.564 | 1.054 | 0.720-1.542 |
| WS-,GS+ | 26  (19.7%) | 0.724 | 0.457-1.147 | 0.727 | 0.455-1.160 | 0.725 | 0.453-1.159 |
| WS+,GS- | 55  (24.8%) | 1.445 | 1.027-2.033 | 1.391 | 0.970-1.995 | 1.445 | 0.905-1.679 |
| TUGT-,GS- | 70  (32.7%) | 2.422* | 1.731-3.389 | 2.107* | 1.454-3.053 | 2.091* | 1.440-3.036 |
| TUGT-,GS+ | 42  (28.4%) | 1.279 | 0.860-1.901 | 1.356 | 0.895-2.052 | 1.279 | 0.841-1.945 |
| TUGT-,WS- | 71  (28.2%) | 1.318 | 0.945-1.837 | 1.072 | 0.749-1.535 | 1.051 | 0.733-1.508 |
| TUGT-,WS+ | 41  (37.3%) | 3.341* | 2.211-5.048 | 3.382* | 2.226-5.136 | 2.943* | 1.885-4.592 |
| TUGT+,WS- | 17  (18.1%) | 0.654 | 0.378-1.134 | 0.64 | 0.367-1.115 | 0.642 | 0.368-1.121 |
| TUGT+,GS- | 47  (21.2%) | 0.781 | 0.541-1.128 | 0.712 | 0.483-1.050 | 0.733 | 0.497-1.082 |
| TUGT-,GS-,WS- | 50  (30.1%) | 1.448 | 0.995-2.108 | 1.117 | 0.743-1.680 | 1.104 | 0.732-1.663 |
| TUGT-,GS-,WS+ | 20  (40.8%) | 6.056* | 3.311-11.076 | 5.544* | 3.009-10.214 | 5.499* | 2.982-10.140 |
| TUGT-,GS+,WS+ | 21  (34.4%) | 1.69 | 0.973-2.936 | 1.914 | 1.083-3.384 | 1.766 | 0.989-3.152 |
| TUGT-,GS+,WS- | 21  (24.1%) | 0.981 | 0.585-1.646 | 0.966 | 0.569-1.642 | 0.946 | 0.556-1.609 |
| TUGT+,GS-,WS- | 12  (24.5%) | 1.002 | 0.513-1.959 | 0.923 | 0.467-1.824 | 0.904 | 0.456-1.789 |
| TUGT+,GS+,WS- | 5  (2.3%) | 0.362* | 0.141-0.928 | 0.384* | 0.149-0.989 | 0.396 | 0.154-1.022 |
| TUGT+,GS-,WS+ | 35  (20.2%) | 0.741 | 0.493-1.114 | 0.693 | 0.454-1.058 | 0.721 | 0.471-1.104 |
| Logistic regression analysis of the relationship between any-falls and TUGT, WS, GS and their combinations. TUGT: timed up and go test; GS: grip strength/weight; WS: walking speed. Model 1 adjusted age and gender; Model 2 additional adjusted cohabit with spouse, walking aid, IPAQ, fall history, diabetes and depression. “TUGT+”<10.31s, “TUGT-”>10.31s; “GS+”>0.3742kg/kg, “GS-”<0.3742kg/kg; “WS+”>0.9467m/s, “WS-”<0.9467m/s.  *P <0.05 versus no-fall group. | | | | | | | |

| Supplementary Table 2. Odds ratio(OR) and 95% confidence interval (95%CI) of TUGT, WS,GS and their combinations for recurrent-falls group during the follow-up period | | | | | | | |
| --- | --- | --- | --- | --- | --- | --- | --- |
| Variables | Recurrent-fallers  n (%) | Crude | | Model 1 | | Model 2 | |
| OR | 95%CI | OR | 95%CI | OR | 95%CI |
| GS- | 42  (8.7%) | 1.925* | 1.140-3.250 | 1.52 | 0.822-2.811 | 1.616 | 0.834-3.130 |
| WS- | 24  (8.5%) | 0.909 | 0.538-1.537 | 1.436 | 0.758-2.720 | 1.732 | 0.881-3.407 |
| TUGT- | 45 (15.2%) | 3.586* | 2.087-6.160 | 2.705* | 1.526-4.792 | 2.150* | 1.169-3.954 |
| WS-,GS- | 25 (11.7%) | 1.600 | 0.961-2.666 | 0.995 | 0.565-1.751 | 1.105 | 0.605-2.018 |
| WS-,GS+ | 11  (8.3%) | 0.868 | 0.444-1.698 | 0.89 | 0.448-1.767 | 0.874 | 0.434-1.758 |
| WS+,GS- | 13  (5.9%) | 1.457 | 0.871-2.438 | 1.447 | 0.838-2.497 | 1.427 | 0.794-2.565 |
| TUGT-,GS- | 33 (18.5%) | 3.641* | 2.173-6.102 | 2.751* | 1.539-4.919 | 2.536* | 1.351-4.759 |
| TUGT-,GS+ | 20  (9.9%) | 1.173 | 0.676-2.037 | 0.718 | 0.391-1.318 | 0.678 | 0.353-1.299 |
| TUGT-,WS- | 31 (12.3%) | 1.776 | 1.092-2.889 | 1.183 | 0.695-2.014 | 1.245 | 0.708-2.189 |
| TUGT-,WS+ | 13 (11.8%) | 4.684* | 2.696-8.139 | 5.019* | 2.832-8.894 | 3.903* | 2.093-7.279 |
| TUGT+,WS- | 5  (5.3%) | 0.524 | 0.205-1.338 | 0.537 | 0.208-1.388 | 0.586 | 0.224-1.532 |
| TUGT+,GS- | 10  (4.5%) | 0.506 | 0.253-1.014 | 0.498 | 0.241-1.025 | 0.619 | 0.293-1.310 |
| TUGT-,GS-,WS- | 21 (12.7%) | 1.771* | 1.031-3.040 | 1.050 | 0.577-1.912 | 1.138 | 0.602-2.154 |
| TUGT-,GS-,WS+ | 20 (44.4%) | 11.235* | 5.809-21.730 | 10.024* | 5.091-19.738 | 8.260* | 3.880-17.585 |
| TUGT-,GS+,WS+ | 6  (9.8%) | 1.306 | 0.535-3.187 | 1.551 | 0.615-3.910 | 1.121 | 0.368-3.416 |
| TUGT-,GS+,WS- | 10 (11.5%) | 1.339 | 0.657-2.727 | 1.297 | 0.621-2.708 | 1.240 | 0.586-2.625 |
| TUGT+,GS-,WS- | 4  (8.2%) | 0.92 | 0.319-2.654 | 0.847 | 0.288-2.493 | 0.953 | 0.317-2.859 |
| TUGT+,GS+,WS- | 6  (3.5%) | 0.198 | 0.027-1.460 | 0.233 | 0.031-1.728 | 0.242 | 0.032-1.812 |
| TUGT+,GS-,WS+ | 1  (2.2%) | 0.318 | 0.136-0.748 | 0.296 | 0.124-0.706 | 0.354 | 0.146-0.858 |
| Logistic regression analysis of the relationship between recurrent-falls and TUGT, WS, GS and their combinations. TUGT: timed up and go test; GS: grip strength/weight; WS: walking speed. Model 1 adjusted age and gender; Model 2 additionally adjusted cohabiting with spouse, walking aid, IPAQ, diabetes, peptic ulcer, biliary tract disease, osteoarthritis and depression. “TUGT+”<10.31s, “TUGT-”>10.31s; “GS+”>0.3742kg/kg, “GS-”<0.3742kg/kg; “WS+”>0.9467m/s, “WS-”<0.9467m/s.  *P <0.05 versus no-fall group. | | | | | | | |
